# Supplementary material for: Using logic programming for modeling the one-carbon metabolism network to study the impact of folate deficiency on methylation processes
Source: Royal Society of Chemistry journal article supplement (doi:10.1039/c1mb05102d), 2011-06-07
Supplement: c1mb05102d.pdf [file c1mb05102d.pdf]

## Using logic programming for modeling the one-carbon metabolism network to study the impact of folate deficiency on methylation processes

Gnimpieba et al.

### SUPPLEMENTARY MATERIAL

#### Illustration of parameters identification.

For illustration purpose, we propose herein to perform the parameter estimation on the Methionine Synthase (MS) reaction. It implies three BK describe as follow: BK<sub>1</sub>: “*healthy human plasma homocysteine amount extended between 5 and 15 μM*” (53)

$$F_1 = \{ \text{Organism}(\text{human}), \text{State}(\text{healthy}), \text{Param}(\text{Hcy}), \text{ValP}(\text{Hcy}, 15, \mu\text{M}) \}$$

which expresses five distinct facts: (i) human is an organism, (ii) healthy is a state, (iii) Hcy (homocysteine) is a parameter, (iv) Hcy can take value 5μM or (v) 15 μM.

$$R_1 = \left\{ \begin{array}{l} [\text{Organism}(\text{human}), \text{Organ}(\text{Blood}), \text{Tissu}(\text{Plasma}), \text{State}(\text{healthy})] \\ \Rightarrow [\text{ValP}(\text{Hcy}) \leq 15\mu\text{M}] \end{array} \right\}$$

R<sub>1</sub> suggest to express these facts by the following semantic, “*if the cell is from a healthy human organism and plasma tissue, then homocysteine amount extend between 5 and 15μM*”.

From now, KB contains the first knowledge BK<sub>1</sub> with fact base FB=F<sub>1</sub>; and rule base RB=R<sub>1</sub>).

If we take a second biological knowledge BK<sub>2</sub> in literature, we obtained:

BK<sub>2</sub>: “*In human crude cell, specific activity of methionine synthase reaction (MS) is 2.53μmol/min/mg at 37°C temperature*”

$$F_2 = \left\{ \begin{array}{l} \text{Organism}(\text{human}), \text{Temperature}(37), \text{Cell}(\text{crude}), \text{Re action}(\text{MS}), \\ \text{Param}(\text{Kcat}_{\text{MS}}), \text{ValP}(\text{Kcat}_{\text{MS}}, 2.53, \text{mol} * (\text{min} * \text{mg})^{-1}) \end{array} \right\}$$

$$R_2 = \left\{ \begin{array}{l} [\text{Organism}(\text{human}), \text{Temperature}(37), \text{Cell}(\text{crude}), \text{Re action}(\text{MS})] \\ \Rightarrow \text{ValP}(\text{Kcat}_{\text{MS}}, 2.53, \text{mol} * (\text{min} * \text{mg})^{-1}) \end{array} \right\}$$

Then the rule base RB become

$$RB \vee R_2 = \left\{ \begin{array}{l} [\text{Organism}(\text{human}), \text{Temperature}(37), \text{Cell}(\text{crude}), \text{Re action}(\text{MS})] \\ \Rightarrow \text{ValP}(\text{Kcat}_{\text{MS}}, 2.53, \text{mol} * (\text{min} * \text{mg})^{-1}); \\ [\text{Organism}(\text{human}), \text{Organ}(\text{Blood}), \text{Tissu}(\text{Plasma}), \text{State}(\text{healthy})] \\ \Rightarrow [\text{ValP}(\text{Hcy}) \leq 15\mu\text{M}] \end{array} \right\}$$

By now, KB contains 5 facts and 3 rules extracted from the literature. For consolidation, we add anothe constraint from the Michaelis and Menten kinetic reaction stipulating that

$V_m = K_{cat} * E_0$  where  $V_m$ ,  $K_{cat}$ , and  $E_0$  are respectively the maximal velocity, the catalytic constant and the initial amount of the enzyme which catalyse the given reaction. We then have:

$BK_3$ : "Reaction MS is Michaelis Menten reaction type,  $V_{m\_MS} = K_{cat\_MS} * E_{0\_MS}$ "

$F_3 = \{Param(V_{m\_MS}), Param(E_{0\_MS})\}$

$R_3 = \{V_m = K_{cat\_MS} * E_{0\_MS}\}$

At the end, we obtain  $KB = BK_1 + BK_2 + BK_3 = \{FB: F_1 VF_2 VF_3, RB: R_1 VR_2 VR_3\}$

Experimental condition is a five item given row concerning in order, the organism name, organ name, cell type, physiological state, the optimum pH value, and temperature. For example:

$ExpCond = (Organism, Organ, Cell, State, pH, Temperature)$

$ExpCond_1 = (human, liver, HepG2, healthy, 7.5, 37)$ .
